# Supplementary material for: De Novo Transcriptome Dataset Generation of the Swamp Buffalo Brain and Non‐Brain Tissues
Source: Hindawi journal article supplement (doi:10.1155/2022/4472940), 2022-01-01
Supplement: f1 [file 4472940.f1.pdf]

# Supplementary material

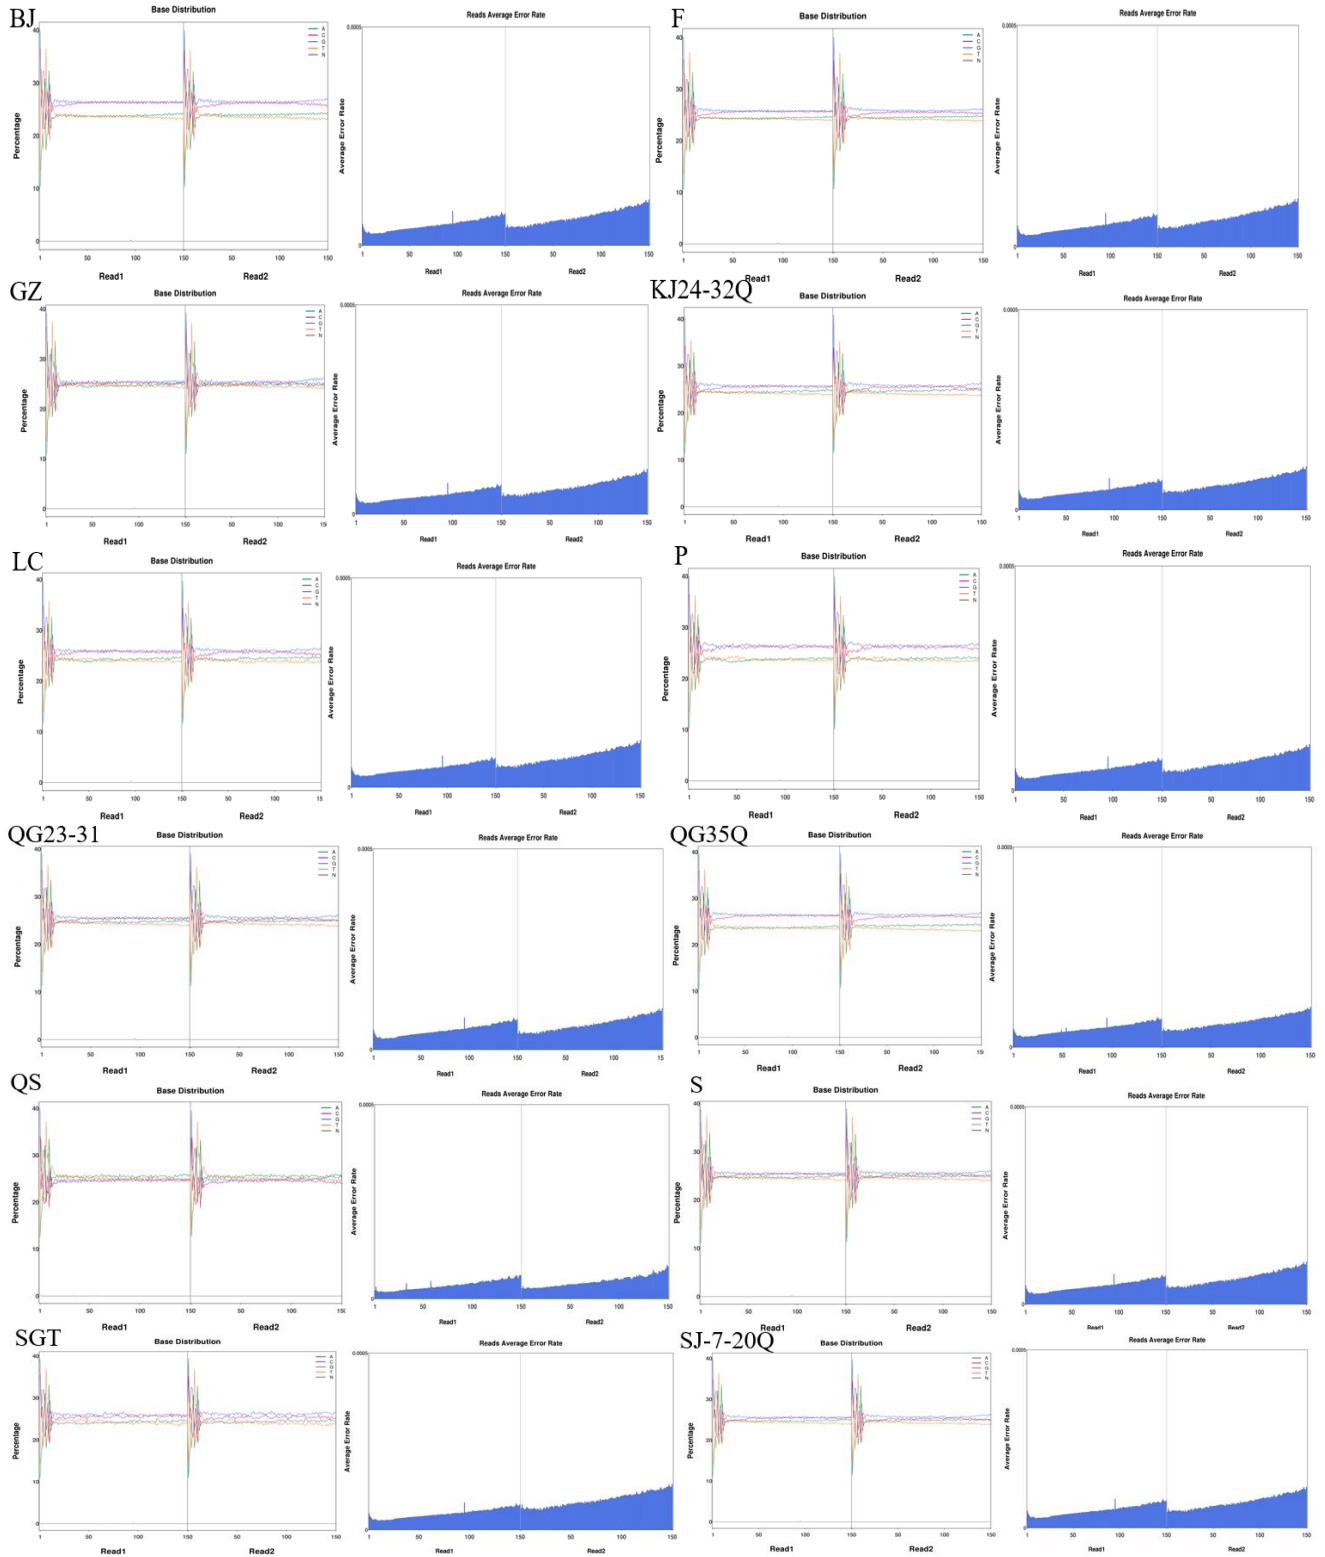

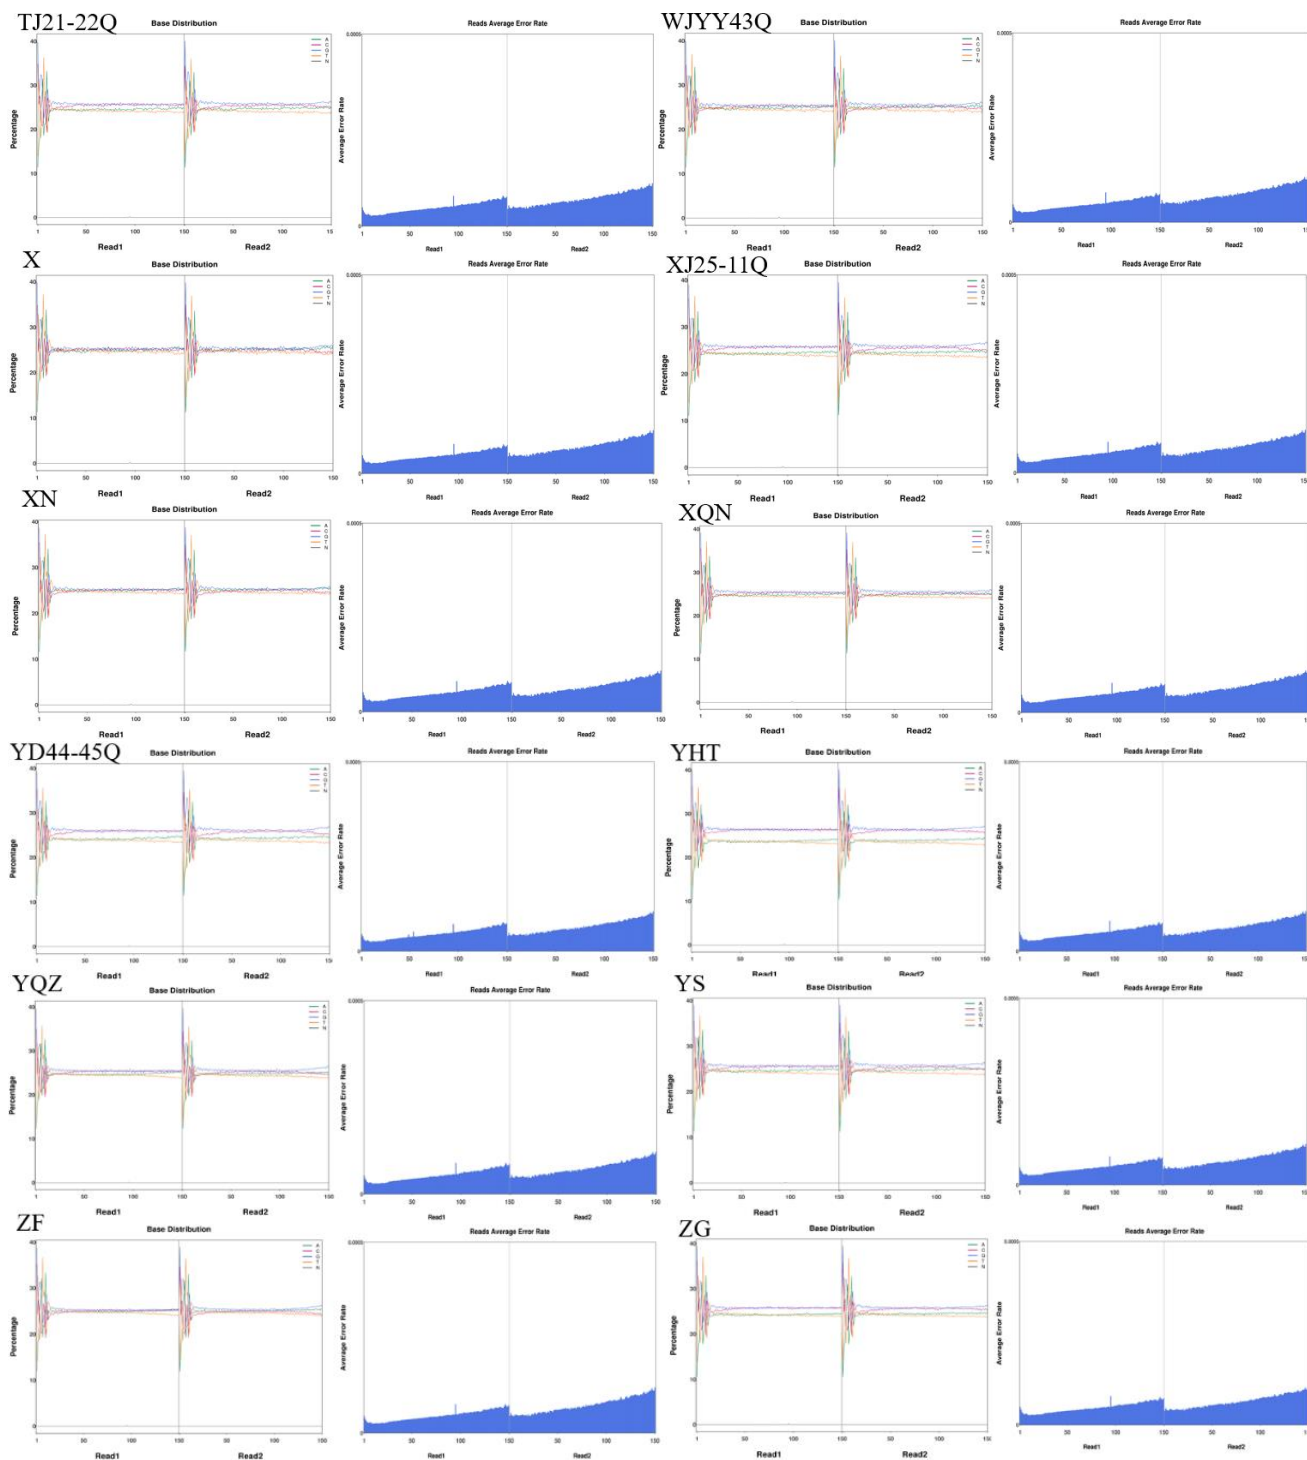

**Figure S1.** The data quality of the samples with ATCG content distribution and base error rates.

[Note: abscissa is the base position of a read, the ordinate is the proportion of base and average error rate for the single base].

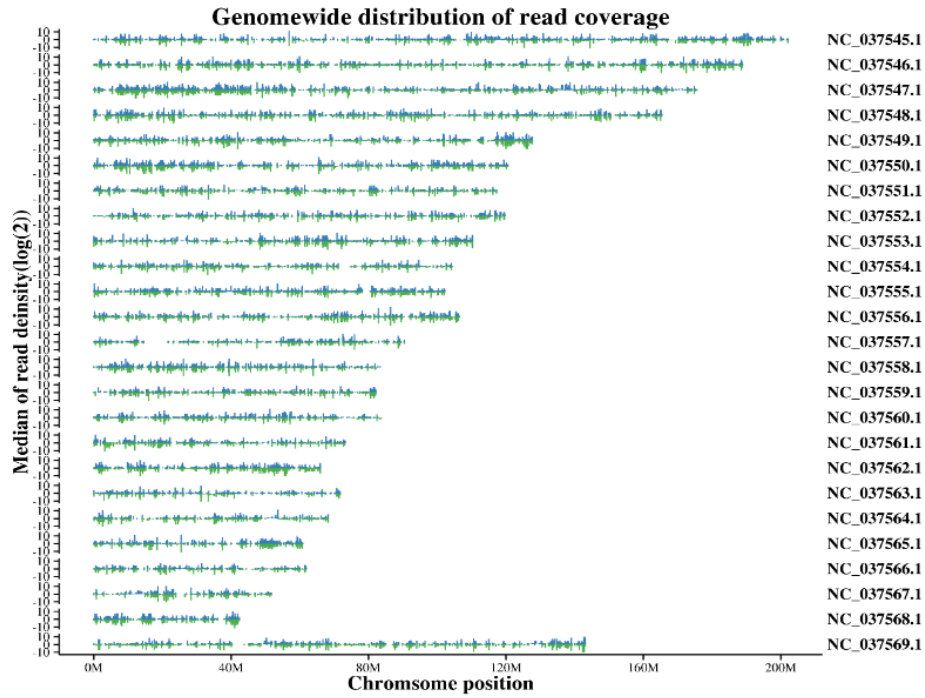

**Figure S2.** Position of mapped reads on the reference genome and coverage depth distribution.

(A)

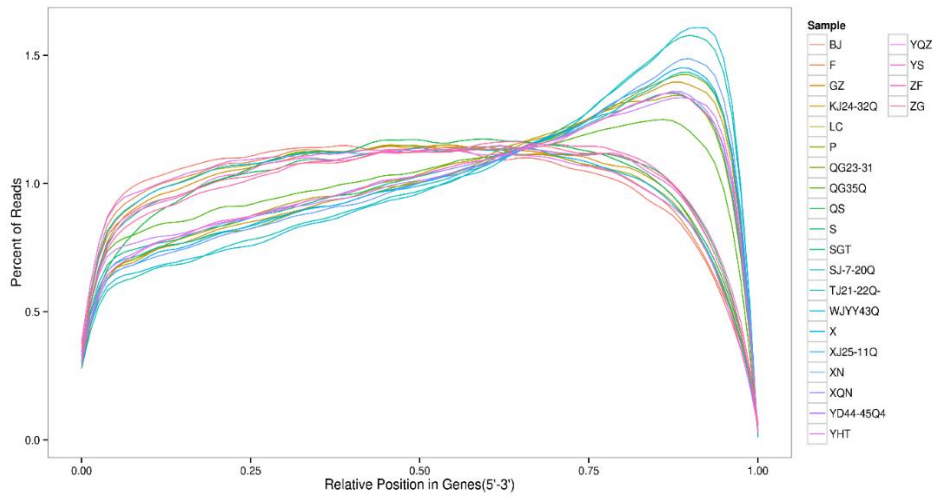

(B)

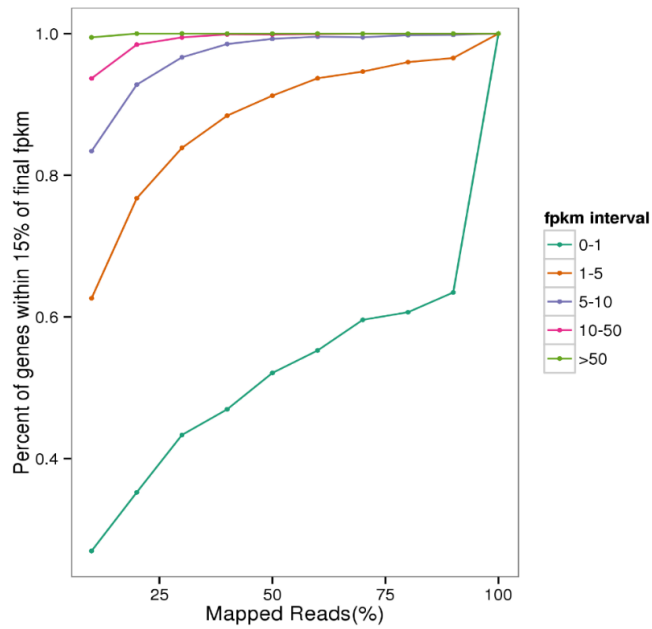

**Figure S3.** (A) The depth distributions of mapped reads on transcripts (B) the RNA-seq data saturation simulation.

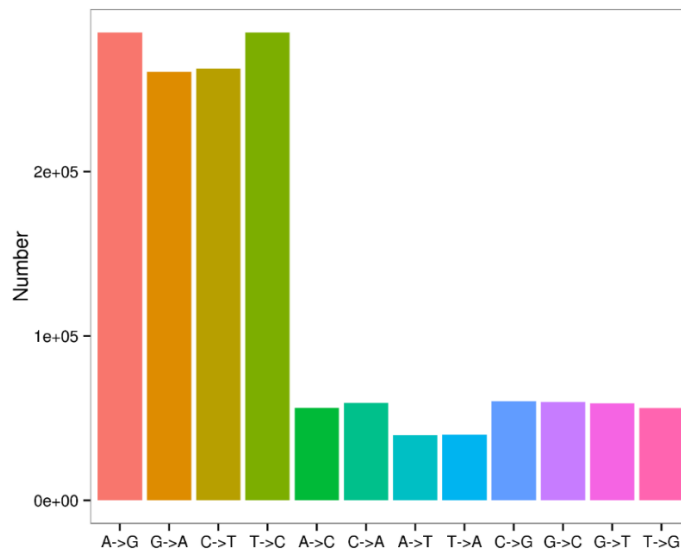

**Figure S4.** The types of SNP mutations in sequenced data (transition and transversion).

[Note: The horizontal axis represents the SNP mutation types, the vertical axis represents the number of the corresponding SNPs].

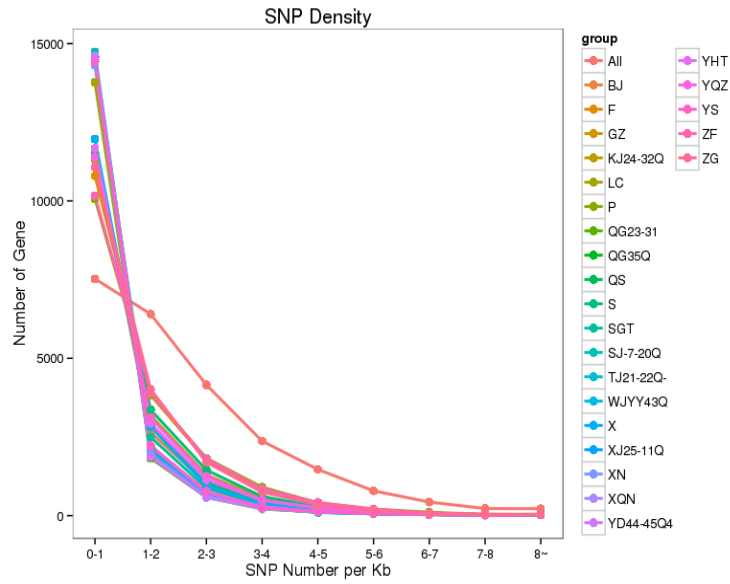

**Figure S5.** The genes SNP density distribution.

[Note: The abscissa represents the average number of SNPs distribution per 1000bp gene sequence, the ordinate represents the number of genes.]

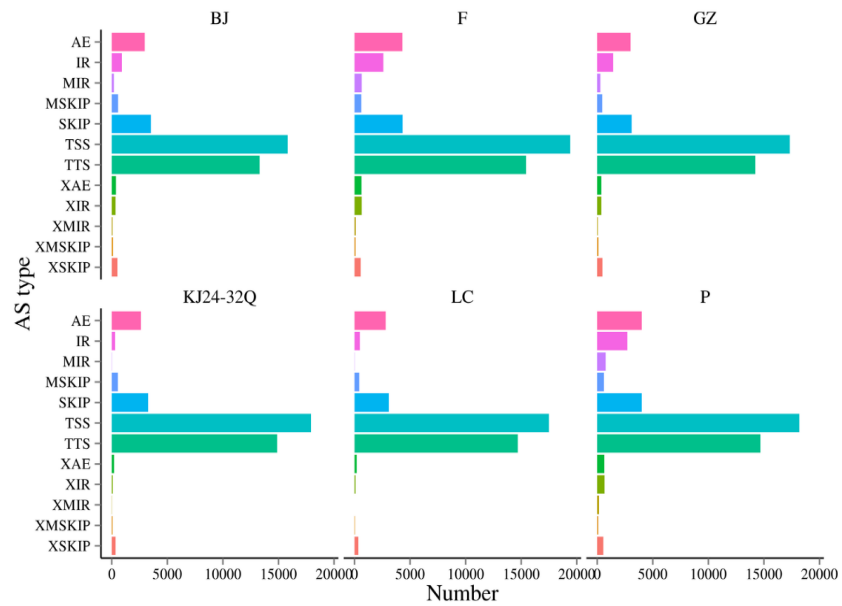

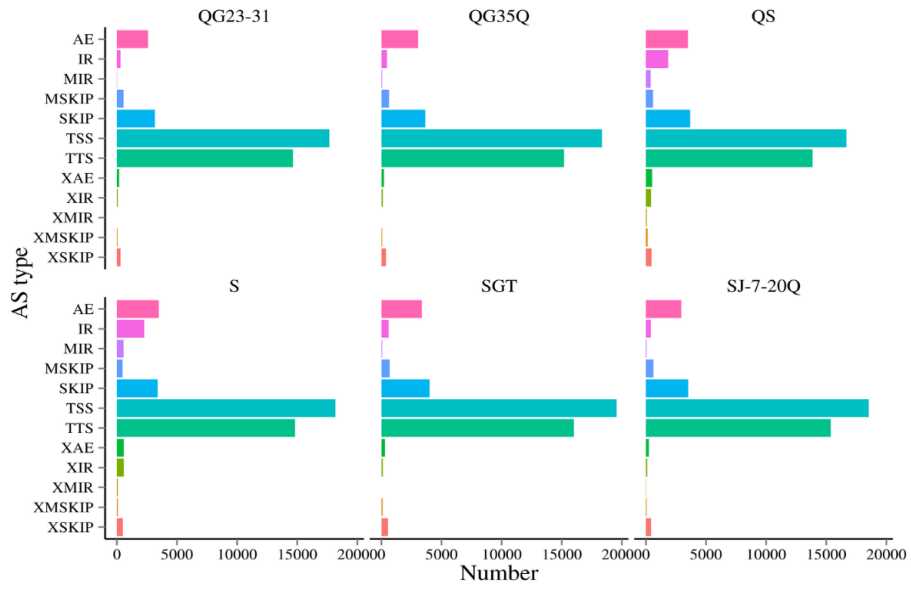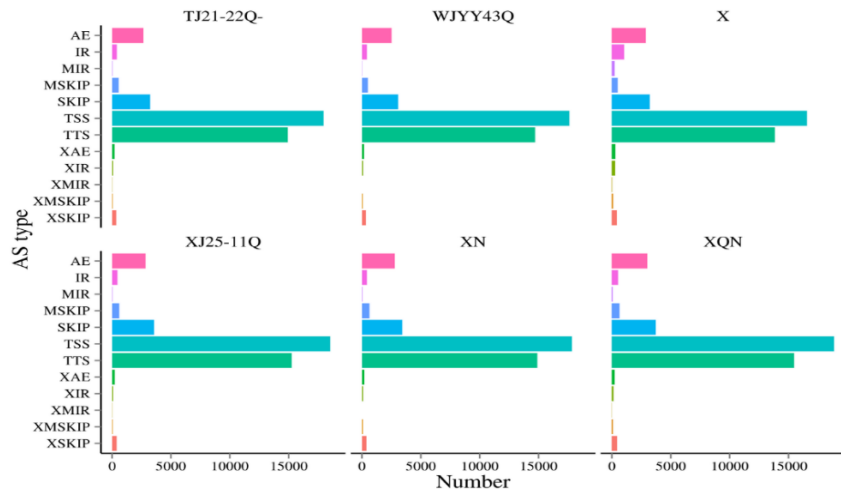

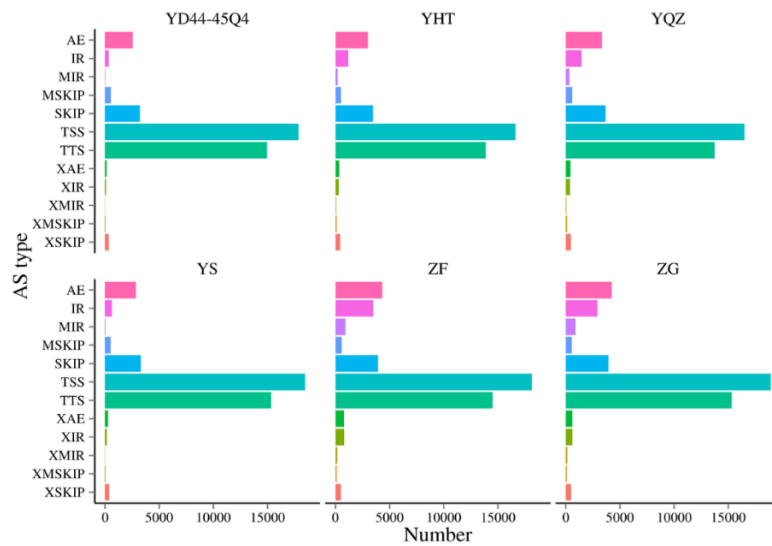

**Figure S6.** Statistics of alternative splicing events.

[Note: The horizontal axis represents a number to one of the alternative transcripts, the vertical axis represents types of alternative splicing events. 1-TSS: Alternative 5' first exon (transcription start site) the first exon splicing; 2-TTS: Alternative 3' last exon (transcription terminal site) the last exon splicing; 3-SKIP: Skipped exon (SKIP\_ON, SKIP\_OFF pair) single exon skipping; 4-XSKIP: Approximate SKIP (XSKIP\_ON, XSKIP\_OFF pair) single exon skipping (fuzzy boundary); 5-MSKIP: Multi-exon SKIP (MSKIP\_ON, MSKIP\_OFF pair) multi-exon skipping; 6-XMSKIP: Approximate MSKIP (XMSKIP\_ON, XMSKIP\_OFF pair) multi-exon skipping (fuzzy boundary); 7-IR: Intron retention (IR\_ON, IR\_OFF pair) single intron retention; 8-XIR: Approximate IR (XIR\_ON, XIR\_OFF pair) single intron retention (fuzzy boundary); 9-MIR: Multi-IR (MIR\_ON, MIR\_OFF pair) multi-intron retention; 10-XMIR: Approximate MIR (XMIR\_ON, XMIR\_OFF pair) multi-intron retention (fuzzy boundary); 11-AE: Alternative exon ends (5', 3', or both); 12-XAE: Approximate AE variable 5' or 3' end (fuzzy boundary)].

**Table S1.** The statistics of the sequenced data.

| <b>Samples</b> | <b>Clean reads</b> | <b>Clean bases</b> | <b>GC Count</b> | <b>%<math>\geq</math>Q30</b> |
|----------------|--------------------|--------------------|-----------------|------------------------------|
| BJ             | 21,868,067         | 6,560,420,100      | 52.67%          | 92.42%                       |
| F              | 25,386,599         | 7,615,979,700      | 51.46%          | 92.29%                       |
| GZ             | 26,166,123         | 7,849,836,900      | 50.63%          | 92.34%                       |
| KJ24-32Q       | 23,320,858         | 6,996,257,400      | 51.44%          | 92.17%                       |
| LC             | 27,749,317         | 8,324,795,100      | 51.79%          | 92.07%                       |
| P              | 26,472,161         | 7,941,648,300      | 52.63%          | 92.52%                       |
| QG23-31        | 23,323,713         | 6,997,113,900      | 51.05%          | 92.33%                       |
| QG35Q          | 21,971,799         | 6,591,539,700      | 52.68%          | 92.62%                       |
| QS             | 28,337,044         | 8,501,113,200      | 49.47%          | 94.61%                       |
| S              | 22,618,701         | 6,785,610,300      | 50.87%          | 92.29%                       |
| SGT            | 27,371,168         | 8,211,350,400      | 51.66%          | 91.27%                       |
| SJ-7-20Q       | 28,331,213         | 8,499,363,900      | 51.07%          | 91.84%                       |
| TJ21-22Q-      | 24,040,796         | 7,212,238,800      | 51.37%          | 91.98%                       |
| WJYY43Q        | 24,677,989         | 7,403,396,700      | 50.76%          | 91.77%                       |
| X              | 25,449,910         | 7,634,973,000      | 50.46%          | 92.25%                       |
| XJ25-11Q       | 24,869,758         | 7,460,927,400      | 51.57%          | 92.19%                       |
| XN             | 26,251,060         | 7,875,318,000      | 50.39%          | 92.06%                       |
| XQN            | 24,571,518         | 7,371,455,400      | 50.82%          | 92.11%                       |
| YD44-45Q4      | 22,511,689         | 6,753,506,700      | 52.05%          | 92.59%                       |
| YHT            | 23,406,717         | 7,022,015,100      | 52.77%          | 92.28%                       |
| YQZ            | 25,582,045         | 7,674,613,500      | 50.92%          | 92.20%                       |
| YS             | 23,182,550         | 6,954,765,000      | 51.21%          | 92.26%                       |
| ZF             | 25,817,126         | 7,745,137,800      | 50.48%          | 92.10%                       |
| ZG             | 21,970,637         | 6,591,191,100      | 51.56%          | 92.46%                       |

[Note: Samples: sample name; Clean reads: Paired-end numbers of Clean Data; Clean bases: total base number of Clean Data; GC content: GC content percentage of Clean Data, namely the percentage of Clean Database G and C;  $\geq$ Q30%: the base which quality value is greater than or equal to 30 percentage of Clean Data].



**Table S2.** The sequenced data mapping statistics.

| <b>Sample</b> | <b>Total Reads</b> | <b>Mapped Reads</b>    | <b>Unique Mapped Reads</b> | <b>Multiple Map Reads</b> | <b>Reads Map to (+)</b> | <b>Reads Map to (-)</b> |
|---------------|--------------------|------------------------|----------------------------|---------------------------|-------------------------|-------------------------|
| BJ            | 43,736,134         | 41,462,810<br>(94.80%) | 40,299,471<br>(92.14%)     | 1,163,339<br>(2.66%)      | 20,637,894<br>(47.19%)  | 20,661,919<br>(47.24%)  |
| F             | 50,773,198         | 47,925,692<br>(94.39%) | 46,594,374<br>(91.77%)     | 1,331,318<br>(2.62%)      | 23,842,833<br>(46.96%)  | 23,889,168<br>(47.05%)  |
| GZ            | 52,332,246         | 49,731,001<br>(95.03%) | 47,888,782<br>(91.51%)     | 1,842,219<br>(3.52%)      | 24,736,589<br>(47.27%)  | 24,804,154<br>(47.40%)  |
| KJ24-32Q      | 46,641,716         | 44,355,163<br>(95.10%) | 43,052,932<br>(92.31%)     | 1,302,231<br>(2.79%)      | 21,990,611<br>(47.15%)  | 22,066,742<br>(47.31%)  |
| LC            | 55,498,634         | 52,015,315<br>(93.72%) | 49,334,684<br>(88.89%)     | 2,680,631<br>(4.83%)      | 25,859,450<br>(46.59%)  | 25,785,017<br>(46.46%)  |
| P             | 52,944,322         | 47,443,076<br>(89.61%) | 44,938,700<br>(84.88%)     | 2,504,376<br>(4.73%)      | 23,671,040<br>(44.71%)  | 23,184,563<br>(43.79%)  |
| QG23-31       | 46,647,426         | 44,247,268<br>(94.85%) | 43,033,828<br>(92.25%)     | 1,213,440<br>(2.60%)      | 21,923,341<br>(47.00%)  | 21,997,123<br>(47.16%)  |
| QG35Q         | 43,943,598         | 41,748,439<br>(95.00%) | 40,461,427<br>(92.08%)     | 1,287,012<br>(2.93%)      | 20,689,864<br>(47.08%)  | 20,773,280<br>(47.27%)  |
| QS            | 56,674,088         | 50,738,692<br>(89.53%) | 49,403,052<br>(87.17%)     | 1,335,640<br>(2.36%)      | 25,265,088<br>(44.58%)  | 25,208,609<br>(44.48%)  |
| S             | 45,237,402         | 42,974,783<br>(95.00%) | 41,801,772<br>(92.41%)     | 1,173,011<br>(2.59%)      | 21,382,931<br>(47.27%)  | 21,422,436<br>(47.36%)  |
| SGT           | 54,742,336         | 51,760,825<br>(94.55%) | 49,866,550<br>(91.09%)     | 1,894,275<br>(3.46%)      | 25,642,929<br>(46.84%)  | 25,735,273<br>(47.01%)  |
| SJ-7-20Q      | 56,662,426         | 53,600,479<br>(94.60%) | 52,158,660<br>(92.05%)     | 1,441,819<br>(2.54%)      | 26,593,449<br>(46.93%)  | 26,655,872<br>(47.04%)  |
| TJ21-22Q-     | 48,081,592         | 45,672,174<br>(94.99%) | 44,346,935<br>(92.23%)     | 1,325,239<br>(2.76%)      | 22,636,452<br>(47.08%)  | 22,708,367<br>(47.23%)  |
| WJYY43Q       | 49,355,978         | 46,817,969<br>(94.86%) | 45,645,423<br>(92.48%)     | 1,172,546<br>(2.38%)      | 23,275,082<br>(47.16%)  | 23,287,090<br>(47.18%)  |
| X             | 50,899,820         | 48,428,087<br>(95.14%) | 47,343,162<br>(93.01%)     | 1,084,925<br>(2.13%)      | 24,176,677<br>(47.50%)  | 24,162,981<br>(47.47%)  |
| XJ25-11Q      | 49,739,516         | 46,820,454<br>(94.13%) | 45,374,560<br>(91.22%)     | 1,445,894<br>(2.91%)      | 23,212,367<br>(46.67%)  | 23,274,660<br>(46.79%)  |
| XN            | 52,502,120         | 49,968,072<br>(95.17%) | 48,583,120<br>(92.54%)     | 1,384,952<br>(2.64%)      | 24,817,682<br>(47.27%)  | 24,847,822<br>(47.33%)  |
| XQN           | 49,143,036         | 46,862,566<br>(95.36%) | 45,559,665<br>(92.71%)     | 1,302,901<br>(2.65%)      | 23,238,763<br>(47.29%)  | 23,307,461<br>(47.43%)  |
| YD44-45Q4     | 45,023,378         | 42,562,217<br>(94.53%) | 41,196,162<br>(91.50%)     | 1,366,055<br>(3.03%)      | 21,090,218<br>(46.84%)  | 21,156,215<br>(46.99%)  |

| 续上表 |            |                        |                        |                      |                        |                        |
|-----|------------|------------------------|------------------------|----------------------|------------------------|------------------------|
| YHT | 46,813,434 | 44,161,365<br>(94.33%) | 42,794,150<br>(91.41%) | 1,367,215<br>(2.92%) | 21,972,723<br>(46.94%) | 21,998,425<br>(46.99%) |
| YQZ | 51,164,090 | 47,976,420<br>(93.77%) | 46,582,386<br>(91.05%) | 1,394,034<br>(2.72%) | 23,837,781<br>(46.59%) | 23,882,301<br>(46.68%) |
| YS  | 46,365,100 | 43,731,874<br>(94.32%) | 42,463,219<br>(91.58%) | 1,268,655<br>(2.74%) | 21,711,132<br>(46.83%) | 21,764,078<br>(46.94%) |
| ZF  | 51,634,252 | 48,206,664<br>(93.36%) | 46,979,834<br>(90.99%) | 1,226,830<br>(2.38%) | 23,894,475<br>(46.28%) | 23,999,694<br>(46.48%) |
| ZG  | 43,941,274 | 41,592,901<br>(94.66%) | 40,530,999<br>(92.24%) | 1,061,902<br>(2.42%) | 20,616,304<br>(46.92%) | 20,673,396<br>(47.05%) |

[Note: Samples: sample name; Total Reads: Reads number of Clean Data, not paired-end reads; Mapped Reads: Reads Number Mapped to the reference genome and the percentage in Clean Reads; Unique Mapped Reads: Reads Number Mapped uniquely mapped to the reference genome and the percentage in Clean Reads; Multiple Mapped Reads: Reads number multiply mapped to reference genome and the percentage in Clean Reads; Reads Map to (+): Reads number mapped to the sense chain and the percentage in Clean Reads. Reads Map to (-): Reads number mapped to the antisense chain and the percentage in Clean Reads].

**Table S3.** Percentage of exonic, intergenic, and intronic regions of mapped reads on the reference genome.

| Sample   | Exon   | Intergenic | Intron |
|----------|--------|------------|--------|
| BJ       | 83.47% | 6.43%      | 10.10% |
| F        | 78.75% | 6.86%      | 14.57% |
| GZ       | 82.38% | 6.04%      | 11.58% |
| KJ24-32Q | 87.63% | 7.26%      | 5.11%  |
| LC       | 88.49% | 6.46%      | 5.05%  |
| P        | 76.56% | 7.32%      | 16.12% |
| QG23-31  | 87.39% | 7.38%      | 5.23%  |
| QG35Q    | 87.08% | 7.36%      | 5.56%  |
| QS       | 80.10% | 7.72%      | 12.18% |
| S        | 78.45% | 7.36%      | 14.19% |
| SGT      | 85.92% | 7.86%      | 6.22%  |
| SJ-7-20Q | 87.20% | 7.45%      | 5.35%  |

|           |        |       |        |
|-----------|--------|-------|--------|
| TJ21-22Q- | 87.32% | 7.18% | 5.50%  |
| WJYY43Q   | 87.24% | 7.49% | 5.27%  |
| X         | 82.70% | 7.06% | 10.24% |
| XJ25-11Q  | 86.90% | 7.46% | 5.64%  |
| XN        | 87.29% | 7.33% | 5.38%  |
| XQN       | 86.40% | 7.66% | 5.94%  |
| YD44-45Q4 | 87.97% | 6.79% | 5.24%  |
| YHT       | 83.68% | 6.40% | 9.92%  |
| YQZ       | 81.62% | 6.87% | 11.51% |
| YS        | 86.48% | 7.23% | 6.29%  |
| ZF        | 75.81% | 7.45% | 16.74% |
| ZG        | 77.09% | 7.89% | 15.02% |

**Table S4.** SNP statistics detected in all samples.

| Sample    | SNP Number | Genic SNP | Intergenic SNP | Transition | Transversion | Heterozygosity |
|-----------|------------|-----------|----------------|------------|--------------|----------------|
| BJ        | 305,396    | 264,414   | 40,982         | 72.57%     | 27.43%       | 20.62%         |
| F         | 494,560    | 433,053   | 61,507         | 72.18%     | 27.82%       | 21.65%         |
| GZ        | 360,607    | 321,024   | 39,583         | 72.55%     | 27.45%       | 21.19%         |
| KJ24-32Q  | 189,058    | 155,893   | 33,165         | 73.01%     | 26.99%       | 25.04%         |
| LC        | 193,900    | 164,494   | 29,406         | 73.08%     | 26.92%       | 24.78%         |
| P         | 495,289    | 440,056   | 55,233         | 72.12%     | 27.88%       | 21.50%         |
| QG23-31   | 189,382    | 154,890   | 34,492         | 72.79%     | 27.21%       | 24.71%         |
| QG35Q     | 209,565    | 174,205   | 35,360         | 73.22%     | 26.78%       | 23.95%         |
| QS        | 339,545    | 295,807   | 43,738         | 72.11%     | 27.89%       | 20.31%         |
| S         | 413,458    | 362,909   | 50,549         | 72.42%     | 27.58%       | 20.63%         |
| SGT       | 258,726    | 209,218   | 49,508         | 72.48%     | 27.52%       | 23.95%         |
| SJ-7-20Q  | 215,004    | 174,830   | 40,174         | 72.83%     | 27.17%       | 24.59%         |
| TJ21-22Q- | 191,806    | 158,908   | 32,898         | 72.92%     | 27.08%       | 24.44%         |
| WJYY43Q   | 188,314    | 154,813   | 33,501         | 73.03%     | 26.97%       | 24.57%         |

|           |         |         |        |        |        |        |
|-----------|---------|---------|--------|--------|--------|--------|
| X         | 304,751 | 266,582 | 38,169 | 72.54% | 27.46% | 21.09% |
| XJ25-11Q  | 213,327 | 176,274 | 37,053 | 72.98% | 27.02% | 24.22% |
| XN        | 205,645 | 166,926 | 38,719 | 72.75% | 27.25% | 24.66% |
| XQN       | 226,332 | 186,483 | 39,849 | 72.78% | 27.22% | 23.85% |
| YD44-45Q4 | 183,666 | 153,151 | 30,515 | 73.03% | 26.97% | 24.67% |
| YHT       | 316,166 | 276,746 | 39,420 | 72.70% | 27.30% | 20.82% |
| YQZ       | 360,544 | 315,887 | 44,657 | 72.28% | 27.72% | 20.71% |
| YS        | 223,159 | 187,640 | 35,519 | 72.86% | 27.14% | 23.50% |
| ZF        | 525,235 | 456,941 | 68,294 | 71.94% | 28.06% | 21.44% |
| ZG        | 479,652 | 418,661 | 60,991 | 72.17% | 27.83% | 21.69% |

[Note: Samples: sample name; SNP Number: total numbers of SNPs; Genic SNP: total numbers of SNPs in the genic region; Intergenic SNP: total numbers of SNPs between genes; Transition: the percentage that the transition-type SNP accounts for all SNP loci's; Transversion: the percentage that the transversion-type SNP loci account for all SNP sites; Heterozygosity: the percentage that the heterozygous SNPs account for all SNPs].
